# Supplementary material
Source: PubMed Central journal article supplement (PMC3487559)
Supplement: supp_2011.061168_2011_061168-Contributions.pdf [file supp_2011.061168_2011_061168-Contributions.pdf]

**Manuscript no. HAEMATOL/2011/061168 entitled “DIPSS scores, pre-transplant therapy and chronic GVHD determine outcome after allogeneic hematopoietic stem cell transplantation for myelofibrosis“**

**Authors: Markus Ditschkowski, Ahmet H. Elmaagacli, Rudolf Trenschele, Tanja Gromke, Nina K. Steckel, Michael Koldehoff, Dietrich W. Beelen**

**Information about the contributions of each person named as having participated in the study**

**1) Guarantor(s)**, i.e., person(s) who is (are) responsible for the integrity of the work as a whole:

- Markus Ditschkowski, Department of Bone Marrow Transplantation, University Hospital Essen, markus.ditschkowski@uk-essen.de
- Dietrich W. Beelen, Department of Bone Marrow Transplantation, University Hospital Essen, Dietrich.beelen@uk-essen.de

According to the International Committee of Medical Journal Editors (ICMJE)

([http://www.icmje.org/ethical\\_1author.html](http://www.icmje.org/ethical_1author.html)): “*Authorship credit should be based on: 1) substantial contributions to conception and design, acquisition of data, or analysis and interpretation of data; 2) drafting the article or revising it critically for important intellectual content; and 3) final approval of the version to be published. Authors should meet conditions 1, 2, and 3 ..... Acquisition of funding, collection of data, or general supervision of the research group alone does not constitute authorship*”.

**The guarantors of this manuscript confirm that all persons designated as authors qualify for authorship, and that each author has participated sufficiently in the work to take public responsibility for appropriate portions of the content.**

**2) Authors who participated in the conception of the study:** Markus Ditschkowski, Dietrich Beelen, Rudolf Trenschele, Ahmet Elmaagacli, Michael Koldehoff

**3) Design & Methods.** The following authors were responsible for specific investigations (please detail):

- Ahmet Elmaagacli was responsible for measurement of JAK-2 mutation
- Nina Steckel was responsible for measurement of JAK-2 mutation and clinical data collection
- Tanja Gromke was responsible for data collection of donors and recipients
- Rudolf Trenschele was responsible for clinical data collection
- Michael Koldehoff was responsible for clinical data collection

**4) Results.** The following authors were responsible for specific portions of the results, including figures and tables (please indicate the person responsible for each figure and each table):

- Markus Ditschkowski was responsible for statistics and tables
- Dietrich Beelen was responsible for statistics and figures
- Michael Koldehoff was responsible for the compilation of risk scores

**5) Writing the manuscript.** The following authors were responsible for writing the manuscript:

- Markus Ditschkowski was responsible for writing of the manuscript

**6) Contributors Listed in Acknowledgments:**

The corresponding author declares that Kathy Astrahantseff from the WTZ Research Support Service (supported in part by the Deutsche Krebshilfe Comprehensive Cancer Center financing) assisted in manuscript preparation.
